# Supplementary material
Source: PubMed Central journal article supplement (PMC2824385)
Supplement: 0909479107_pnas.200909479SI.pdf [file 0909479107_pnas.200909479SI.pdf]

# Supporting Information

Wang et al. 10.1073/pnas.0909479107

## SI Methods

**V $\alpha$ 14-V $\beta$ 8.2 TCR Refolding.** Because initial refolding of the V $\alpha$ 14/V $\beta$ 8.2 TCR resulted in increased  $\alpha$ -homodimerization, we designed a construct in which the V $\alpha$ 14 (TRAV11\*02, TRAJ18\*01; CDR3 $\alpha$ : CVVGDGRGSALGRLHF) and V $\beta$ 8.2 chains (TRBV13-2\*01, TRBJ2-5\*01, TRBD2\*01; CDR3 $\beta$ : CASGEGGLGGPT-QYF) were cloned upstream of the human TCR  $\alpha$  and  $\beta$  constant domains, respectively. To avoid introducing an additional restriction site between variable and constant domains, we used an internal *Bgl*II site within the constant domain of the  $\beta$  chain (in pET30a), and the variable  $\alpha$  chain was fused to a *Bam*HI site within the human constant domain (in pET22b<sup>+</sup>) that was created as a silent mutation through site-directed mutagenesis (5'-CCT GAC CCT-3' changed to 5'-CCG GAT CCT-3'). In addition, two cysteines were incorporated in the constant domain (TRAC 48 and TRBC 57) to form a disulfide bond, and a free cysteine in the constant TCR $\beta$  chain was mutated to serine, to facilitate refolding (1). Both  $\alpha$  and  $\beta$  chains were expressed separately in BL21 (DE3) cells, and inclusion bodies were purified using standard methods. Inclusion bodies were dissolved in 50 mM Tris-HCl, 5 mM EDTA, 2 mM DTT, and 6 M guanidine-HCl, pH 7.0, and stored at -80 °C. The TCR was refolded essentially as reported for the human V $\alpha$ 24V $\beta$ 11 TCR (2, 3) with the following modifications: 32 mg of  $\alpha$  chain and 48 mg of  $\beta$  chain were thawed, mixed, and pulsed with 1 mM DTT and then added drop-wise to 1 L refolding buffer (50 mM Tris-HCl, 0.4 M L-arginine, 5 M urea, 2 mM EDTA, 5 mM reduced glutathione, 0.5 mM oxidized glutathione, and 0.2 mM PMSF, pH 8.0, at RT) under constant stirring at 4 °C. After 16 h, the same amount of  $\alpha$  and  $\beta$  chains were added again, and stirring continued for an additional 8 h. The refolding mix was then dialyzed overnight against 18 L of 10 mM Tris-HCl, 0.1 M urea, and pH 8.0, and then again for 8 h against the same fresh buffer. Finally, the refolding mix was dialyzed against 18 L of 10 mM Tris-HCl, pH 8.0, for 24 h. The refolded protein was purified as outlined in the *Methods*.

**BirA-Tagged V $\alpha$ 14-V $\beta$ 8.2 TCR Gene Construction.** We amplified a C-terminal fragment of the human TCR $\beta$  constant domain with two synthetic oligonucleotides to include a birA-tag: 5'-GCAGAGATCTCCACACCC (an internal *Bgl*II site in the human TCR $\beta$  constant domain, in italics) and 5'-GAATTCTTAACGATGATTCACACCACTTTCTGTGCATCCAGAAATATGATGCAGTGTCTCTACCCAGGCCTC (*Eco*RI site, italics; birA sequence in boldface type). The resulting DNA fragment was digested with *Bgl*II and *Eco*RI and ligated with *Bgl*II-*Eco*RI-digested pET30a containing the mouse V $\beta$ 8.2-human C $\beta$  chimeric TCR.

**Surface Plasmon Resonance Studies.** Recombinant mCD1d protein containing a birA-tag (LHHILDAQKMVWNHR) between the CD1d ectodomain and C-terminal hexahistidine tag was expressed and purified as described previously (4). Before lipid loading, birA-tagged mCD1d was biotinylated using a commercial biotinylation kit (Avidity) and purified from free biotin by SEC on Superdex S200 10/300 GL. Glycolipids (dissolved in 0.5% Tween 20) were loaded overnight, and  $\approx$ 1,000 RU of mCD1d was immobilized on a streptavidin sensor chip (Biacore). The TCR protein was diluted in running buffer without Tween 20 (10 mM Hepes, 150 mM NaCl, and 3 mM EDTA, pH 7.4) to prevent or slow down washing the glycolipid

off mCD1d. A series of increasing concentrations of the TCR in duplicate were passed over the mCD1d glycolipid complex (0.01–0.64  $\mu$ M for  $\alpha$ -GalCer and 0.04–2.5  $\mu$ M for GalA-GSL). The TCR was injected for a 3-min association for  $\alpha$ -GalCer or 5-min association for GalA-GSL, and dissociation was continued over 30 min for  $\alpha$ -GalCer or 5 min for GalA-GSL. Alternatively, the biotinylated TCR was immobilized up to 1,000 RU, and serial dilutions (0.14–36  $\mu$ M) of mCD1d-BbGL-2c complexes were injected for a 2-min association and 2-min dissociation. Experiments were carried out at 25 °C with a flow rate of 30  $\mu$ L/min and performed in total two or three times, each time with a different TCR preparation. Kinetic parameters were calculated after subtracting the response to mCD1d molecules that were incubated only with Tween 20, using a simple Langmuir 1:1 model in the BIA evaluation software version 4.1.

**Data Collection and Crystal Structure Determination.** Crystals were flash-cooled at 100 K in mother liquor containing 20% glycerol. Diffraction data from a single crystals were collected at the Stanford Synchrotron Radiation Laboratory (SSRL) beamlines 7.1 (mCD1d-BbGL-2c) and 9.2 (mCD1d-BbGL-2f) and were processed to 2.05 Å and 1.85 Å resolution, respectively with the Denzo-Scalepack suite (5). mCD1d-BbGL-2c crystallized in monoclinic spacegroup P2<sub>1</sub> (unit cell dimensions:  $a = 41.7$  Å;  $b = 97.8$  Å;  $c = 55.4$  Å;  $\beta = 107.0$ ), and mCD1d-BbGL-2f crystallized in orthorhombic spacegroup P2<sub>1</sub>2<sub>1</sub>2<sub>1</sub> (unit cell dimensions:  $a = 42.1$ ;  $b = 110.4$ ;  $c = 107.5$ ).

In both crystals, one mCD1d-glycolipid molecule occupies the asymmetric unit with an estimated solvent content of 45.4% and  $V_m$  of 2.28 Å<sup>3</sup>/Da for mCD1d-BbGL-2c) or 53.7% solvent content and  $V_m$  of 2.6 Å<sup>3</sup>/Da for mCD1d-BbGL-2f. Molecular replacement was carried out in CCP4 (6) using the program MOLREP (7), with the protein coordinates from the mCD1d-sulfatide structure [PDB code 2AKR (4)] as the search model. For both crystal structures, rigid-body refinement was carried out, followed by several rounds of restrained refinement against the maximum likelihood target in REFMAC 5.2. The refinement progress was judged by monitoring the  $R_{free}$  for cross-validation (8). The model was rebuilt into  $\sigma_A$ -weighted,  $2Fo - Fc$  and  $Fo - Fc$  difference electron density maps using the program COOT (9). Final refinement steps were performed using the TLS procedure in REFMAC (10) with three anisotropic domains ( $\alpha$ 1– $\alpha$ 2 domain including carbohydrates and glycolipid,  $\alpha$ 3-domain, and  $\beta$ 2M). The mCD1d-BbGL-2c structure has a final  $R_{cryst} = 20.8\%$  and  $R_{free} = 25.1\%$ , whereas the mCD1d-BbGL-2f structure has a final  $R_{cryst} = 20.5\%$  and  $R_{free} = 23.3\%$ . The quality of both models (Table S1) was excellent, as assessed with the program Molprobit (11).

**TCR Modeling.** The structures of mCD1d in complex with either BbGL-2c or BbGL-2f were each superimposed onto the mCD1d portion of the recently determined crystal structure of the mCD1d- $\alpha$ -GalCer-V $\alpha$ 14V $\beta$ 8.2 TCR complex [PDB code 3HE6 (12)]. Under the assumption that the TCR maintains a conserved footprint onto CD1d, even when the *Borrelia* ligands are bound, the current TCR model illustrates the binding orientation of BbGL-2c and BbGL-2f within the CD1d-TCR complex.

1. Boulter JM, et al. (2003) Stable, soluble T-cell receptor molecules for crystallization and therapeutics. *Protein Eng* 16:707–711.
2. Gadola SD, et al. (2006) Structure and binding kinetics of three different human CD1d- $\alpha$ -galactosylceramide-specific T cell receptors. *J Exp Med* 203:699–710.

3. Kjer-Nielsen L, et al. (2006) A structural basis for selection and cross-species reactivity of the semi-invariant NKT cell receptor in CD1d/glycolipid recognition. *J Exp Med* 203:661–673.
4. Zajonc DM, et al. (2005) Structural basis for CD1d presentation of a sulfatide derived from myelin and its implications for autoimmunity. *J Exp Med* 202:1517–1526.

5. Otwinowski Z, Minor W (1997) HKL: Processing of X-ray diffraction data collected in oscillation mode. *Methods Enzymol* 276:307–326.
6. CCP4 (1994) Collaborative Computational Project, Number 4. The CCP4 Suite: Programs for protein crystallography. *Acta Crystallogr D* 50:760–763.
7. Vagin AA, Teplyakov A (1997) MOLREP: An automated program for molecular replacement. *J Appl Cryst* 30:1022–1025.
8. Brünger AT (1992) Free R value: A novel statistical quantity for assessing the accuracy of crystal structures. *Nature* 355:472–475.
9. Emsley P, Cowtan K (2004) Coot: Model-building tools for molecular graphics. *Acta Crystallogr D Biol Crystallogr* 60:2126–2132.
10. Winn MD, Isupov MN, Murshudov GN (2001) Use of TLS parameters to model anisotropic displacements in macromolecular refinement. *Acta Crystallogr D* 57:122–133.
11. Lovell SC, et al. (2003) Structure validation by  $\phi$ ,  $\psi$  and  $C_{\beta}$  deviation. *Proteins* 50:437–450.
12. Pellicci DG, et al. (2009) Differential recognition of CD1d- $\alpha$ -galactosyl ceramide by the V  $\beta$  8.2 and V  $\beta$  7 semi-invariant NKT T cell receptors. *Immunity* 31:47–59.
13. Zajonc DM, et al. (2005) Structure and function of a potent agonist for the semi-invariant natural killer T cell receptor. *Nat Immunol* 8:810–818.
14. Koch M, et al. (2005) The crystal structure of human CD1d with and without  $\alpha$ -galactosylceramide. *Nat Immunol* 8:819–826.

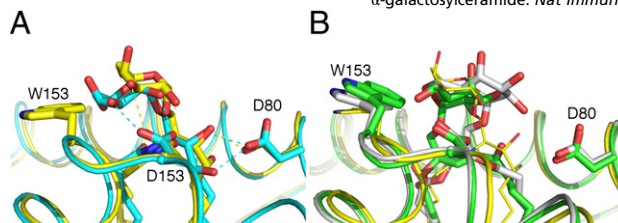

**Fig. S1. Structural differences between mouse and human CD1d.** (A) Overlay of human (yellow) and mouse (light blue) CD1d- $\alpha$ -GalCer complexes [PDB codes 1Z5L (13) and 1ZT4 (14)] illustrates the influence of tryptophan153 (W153) in the presentation of the galactose epitope. (B) Superimposition of the human CD1d- $\alpha$ -GalCer structure (yellow) with that of mouse CD1d with bound BbGL-2c (gray) and BbGL-2f (green). The influence of the mCD1dG155W mutant is modeled, and indicates that the tryptophan side chain is too close to the galactose moieties and will affect the presentation of both BbGL-2c and BbGL-2f.

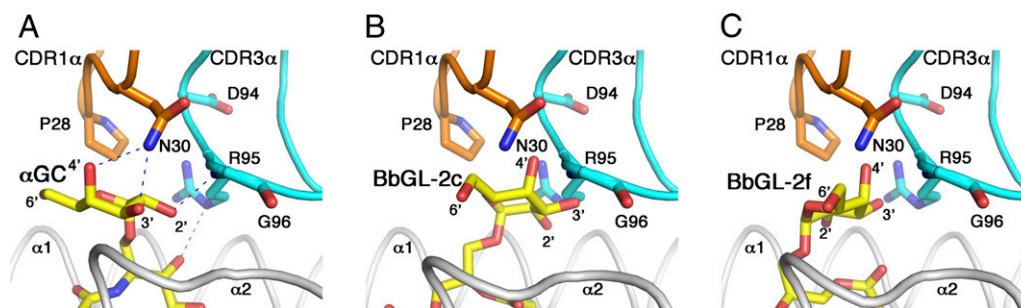

**Fig. S2. TCR-glycolipid structures and models.** (A) Crystal structure of the mCD1d- $\alpha$ -GalCer-V $\alpha$ 14V $\beta$ 8.2 TCR complex [PDB code 3HE6 (12)] and derived models of mCD1d-bound BbGL-2c (B) and BbGL-2f (C). Note that this model illustrates the steric clashes between the *Borrelia* glycolipid BbGL-2c with CDR3 $\alpha$  of the TCR in this docking orientation. H bonds are illustrated as blue dashed lines only for the actual crystal structure but not for the models. Glycolipids are depicted with yellow sticks, mCD1d in gray, TCR  $\alpha$  chain CDR1 region in orange, and CDR3 region in cyan. TCR residues that interact with  $\alpha$ -GalCer in A are shown as sticks.

**Table S1. Data collection and refinement statistics**

|                                                  | mCD1d-BbGL-2c         | mCD1d-BbGL-2f         |
|--------------------------------------------------|-----------------------|-----------------------|
| Data collection                                  |                       |                       |
| Resolution range (Å)*                            | 50.0–2.05 (2.12–2.05) | 40.0–1.85 (1.92–1.85) |
| Completeness (%)*                                | 93.3 (90.0)           | 91.2 (94.4)           |
| Number of unique reflections                     | 25,018                | 39,906                |
| Redundancy                                       | 4.4                   | 3.2                   |
| R <sub>sym</sub> <sup>*†</sup> (%)               | 6.7 (60.4)            | 6.1 (38.3)            |
| I/σ*                                             | 35.9 (3.6)            | 21.6 (3.6)            |
| Refinement statistics                            |                       |                       |
| Number of reflections (F > 0)                    | 23,962                | 38,588                |
| Maximum resolution (Å)                           | 2.05                  | 1.85                  |
| R <sub>cryst</sub> <sup>‡</sup> (%)              | 20.8 (31.0)           | 20.5 (23.1)           |
| R <sub>free</sub> <sup>§</sup> (%)               | 25.1 (32.0)           | 23.3 (23.9)           |
| Number of atoms                                  | 3,151                 | 3,272                 |
| Protein                                          | 2,911                 | 2,942                 |
| Glycolipid                                       | 53                    | 55                    |
| N-linked carbohydrate                            | 56                    | 42                    |
| Solvent molecules (waters/DMSO)                  | 131/0                 | 229/4                 |
| Ramachandran statistics (%)                      |                       |                       |
| Favored                                          | 98.6                  | 98.6                  |
| Outliers                                         | 0.0                   | 0.0                   |
| RMSD from ideal geometry                         |                       |                       |
| Bond length (Å)                                  | 0.016                 | 0.013                 |
| Bond angles (°)                                  | 1.70                  | 1.43                  |
| Average B values (Å <sup>2</sup> ) <sup>  </sup> |                       |                       |
| Protein                                          | 52.5                  | 25.6                  |
| Glycolipid                                       | 77.5                  | 53.6                  |
| Water molecules                                  | 32.45                 | 19.6                  |
| Carbohydrates                                    | 70.7                  | 37.2                  |

\*Numbers in parentheses refer to highest-resolution shell.

<sup>†</sup>R<sub>sym</sub> =  $(\sum_h \sum_i |I_i(h) - \langle I(h) \rangle|) / (\sum_h \sum_i I_i(h)) \times 100$ , where  $\langle I(h) \rangle$  is the average intensity of *i* symmetry-related observations for reflections with Bragg index *h*.

<sup>‡</sup>R<sub>cryst</sub> =  $(\sum_{hkl} |F_o - F_c| / \sum_{hkl} |F_o|) \times 100$ , where *F<sub>o</sub>* and *F<sub>c</sub>* are the observed and calculated structure factors, respectively, for all data.

<sup>§</sup>R<sub>free</sub> was calculated as for R<sub>cryst</sub>, but on 2% (CD1d) and 1.5% (TCR) of data excluded before refinement.

<sup>||</sup>B values were calculated with the CCP4 program TLSANL (1).

1. Winn MD, Isupov MN, Murshudov GN (2001) Use of TLS parameters to model anisotropic displacements in macromolecular refinement. *Acta Crystallogr D* 57:122–133.
